# Supplementary material for: 15-year variability of desert dust optical depth on global and regional scales
Source: Copernicus journal article supplement (doi:10.5194/acp-21-16499-2021), 2021-11-11
Supplement: Supplementary file 1 [file acp-21-16499-2021-supplement.pdf]

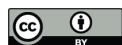

*Supplement of*

## **15-year variability of desert dust optical depth on global and regional scales**

**Stavros-Andreas Logothetis et al.**

*Correspondence to:* Andreas Kazantzidis (akaza@upatras.gr)

The copyright of individual parts of the supplement might differ from the article licence.

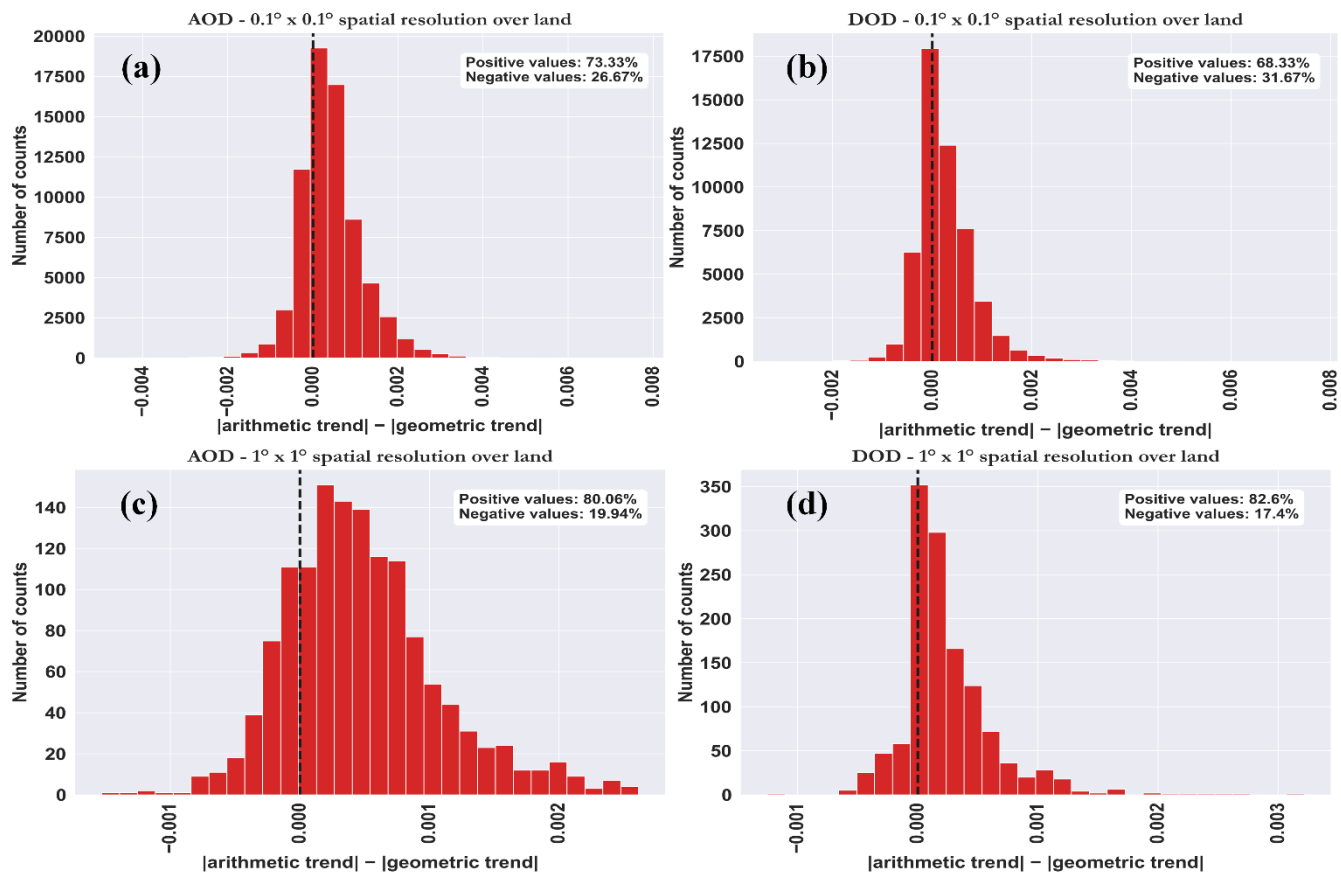

**Figure S1: Histograms showing the differences between geometric-based and arithmetic-based trends for (a) AOD and (b) DOD at  $0.1^\circ \times 0.1^\circ$  and (c) AOD and (d) DOD at  $1^\circ \times 1^\circ$  over land.**

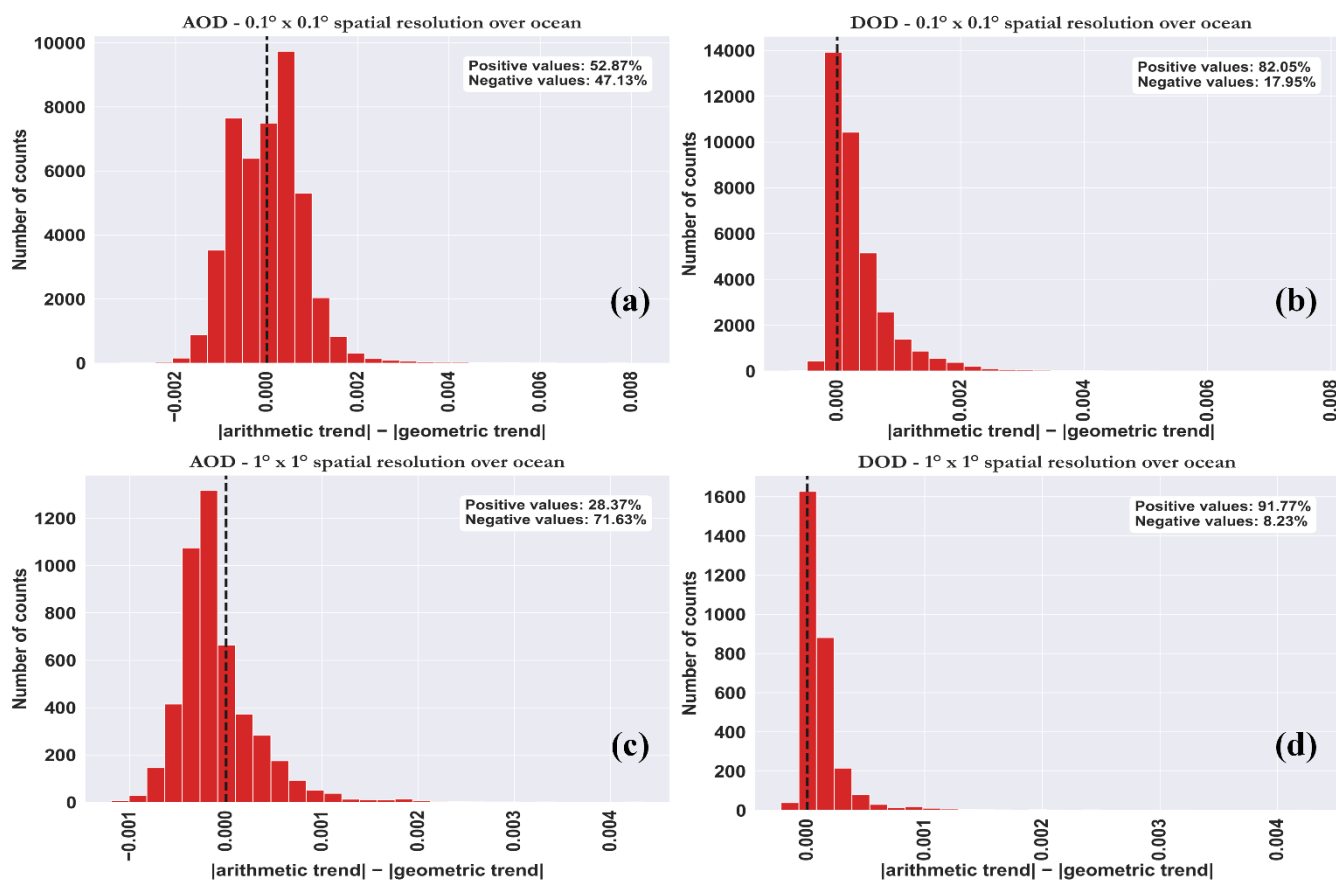

Figure S2: Same as Fig. S1 over ocean.

(a) Total number of months at  $0.1^\circ \times 0.1^\circ$  spatial resolution

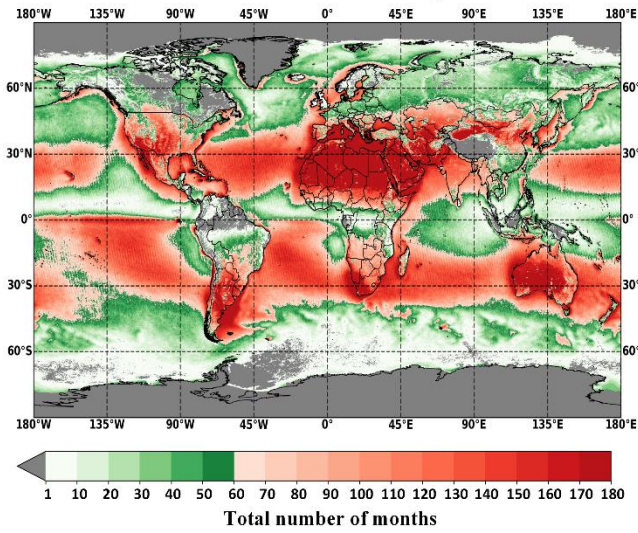

(b) Total number of months at  $1^\circ \times 1^\circ$  spatial resolution

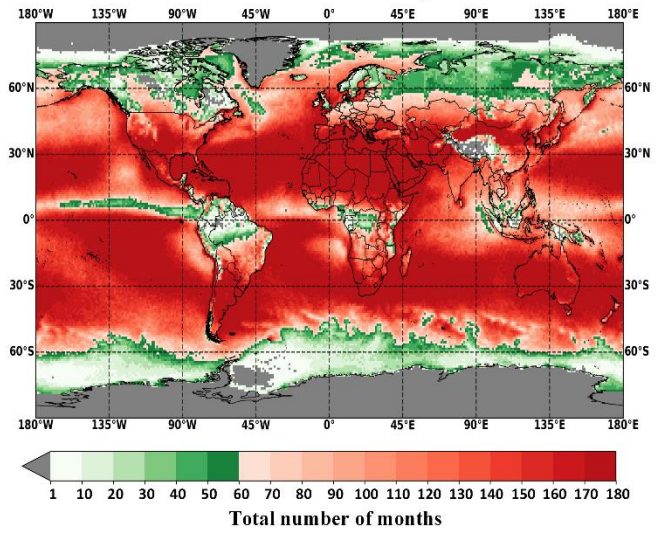

**Figure S3: Global distribution of total number of months at (a)  $0.1^\circ \times 0.1^\circ$  and (b)  $1^\circ \times 1^\circ$  spatial resolution. The pixels with not available data are colored with gray color while those of failing to meet the availability criteria (see Sect. 2.3) are colored with greenish.**

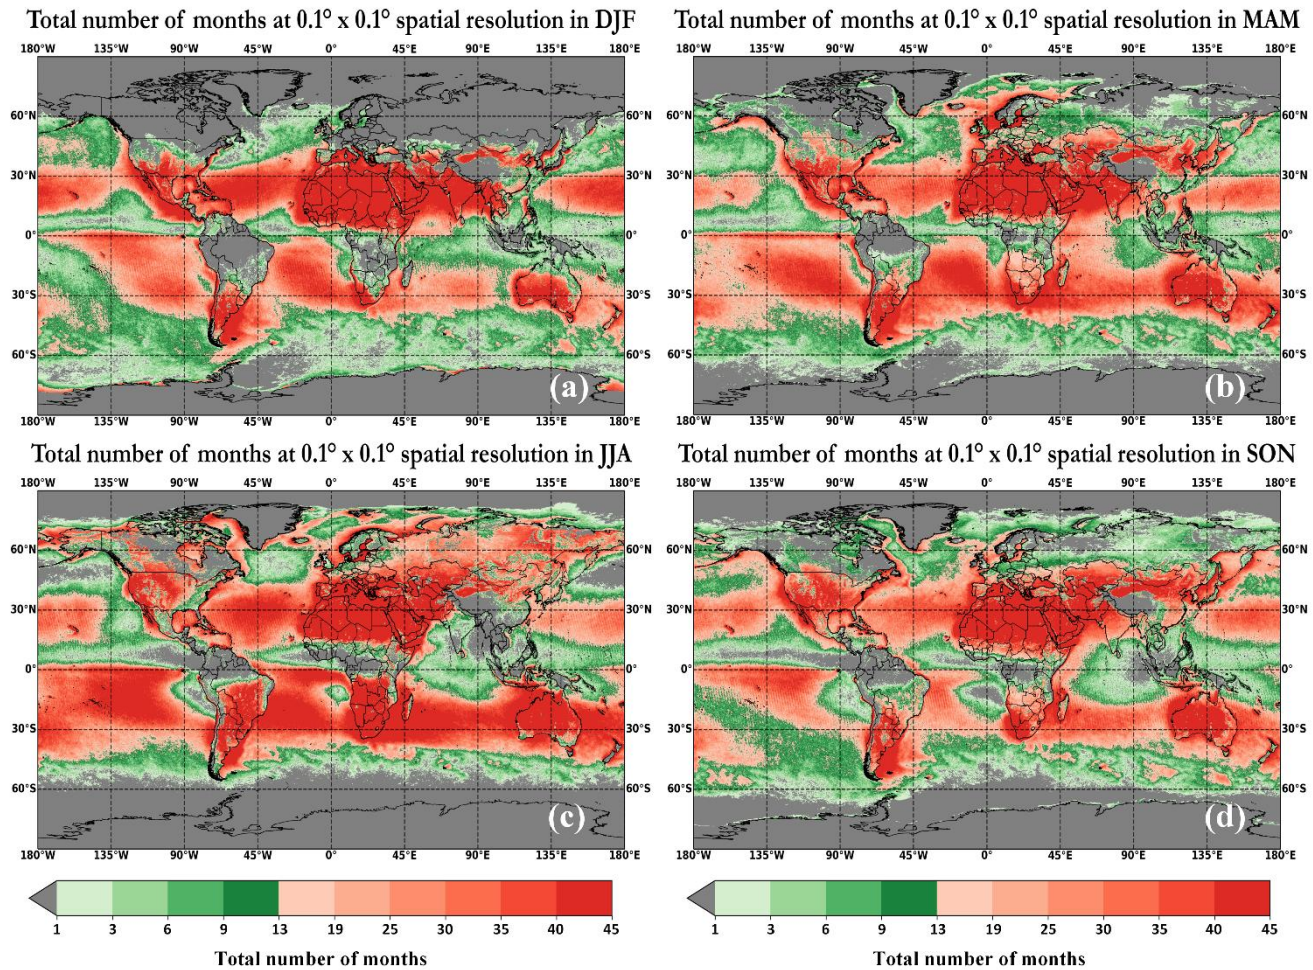

**Figure S4: Total number of months at (a) December-January-February (DJF), (b) March-April-May (MAM), (c) June-July-August (JJA), and (d) September-October-November (SON) at  $0.1^\circ \times 0.1^\circ$  spatial resolution.**



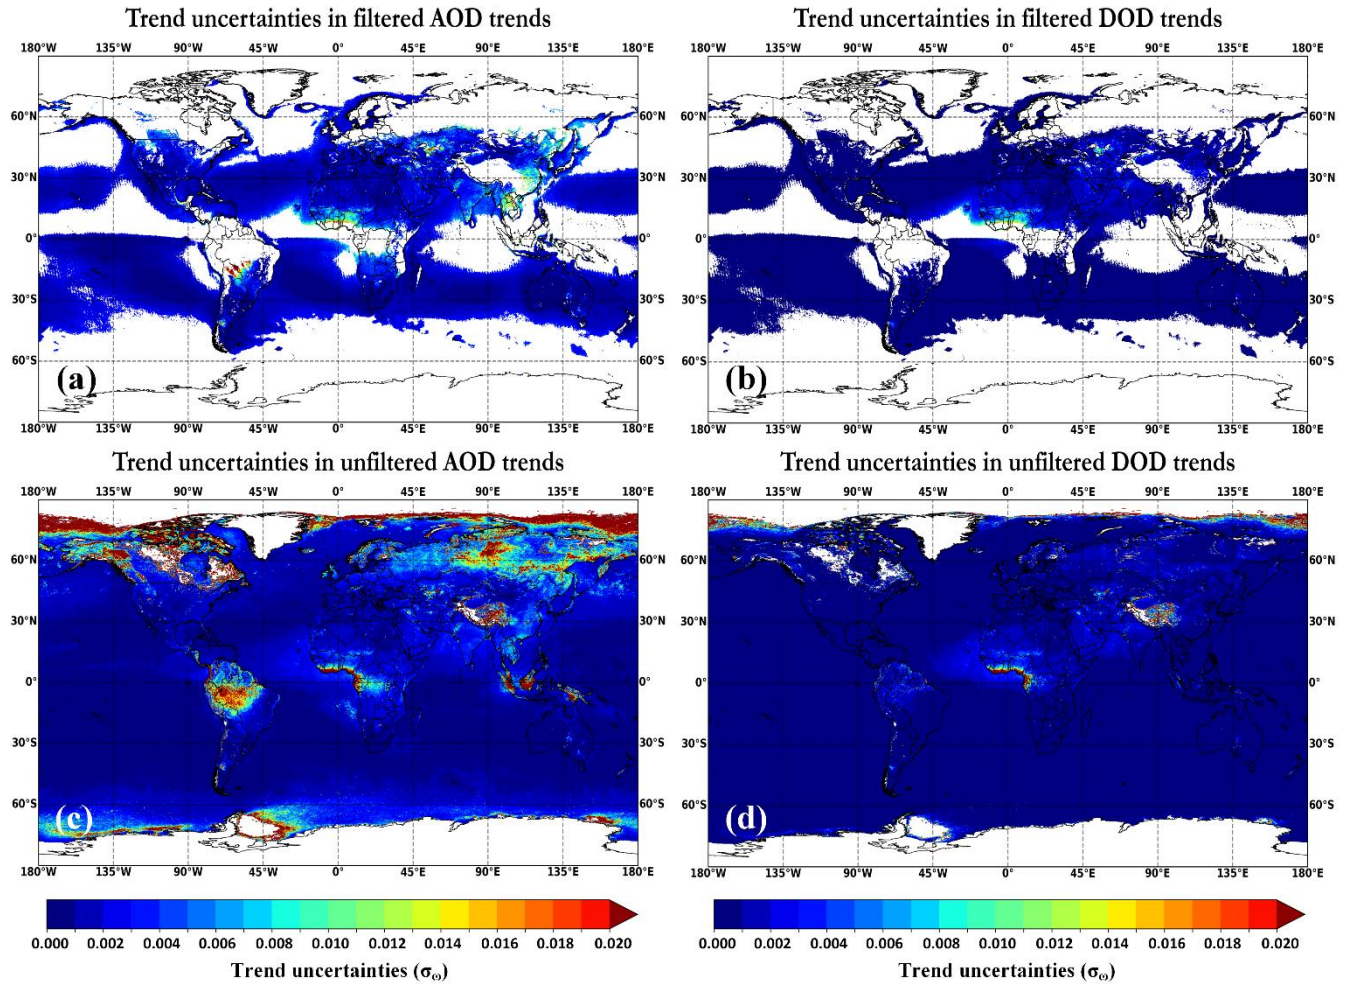

**Figure S5:** Global maps of temporal trends uncertainties, at  $0.1^\circ \times 0.1^\circ$  spatial resolution, using Eq. (3) for AOD (a and c) and DOD (b and d). Upper panel (a, b) shows the filtered trends uncertainties (based on Fig. 2c, d trends) while the bottom panel (c, d) indicates the unfiltered trends uncertainties (based on Fig. 5a, b trends).

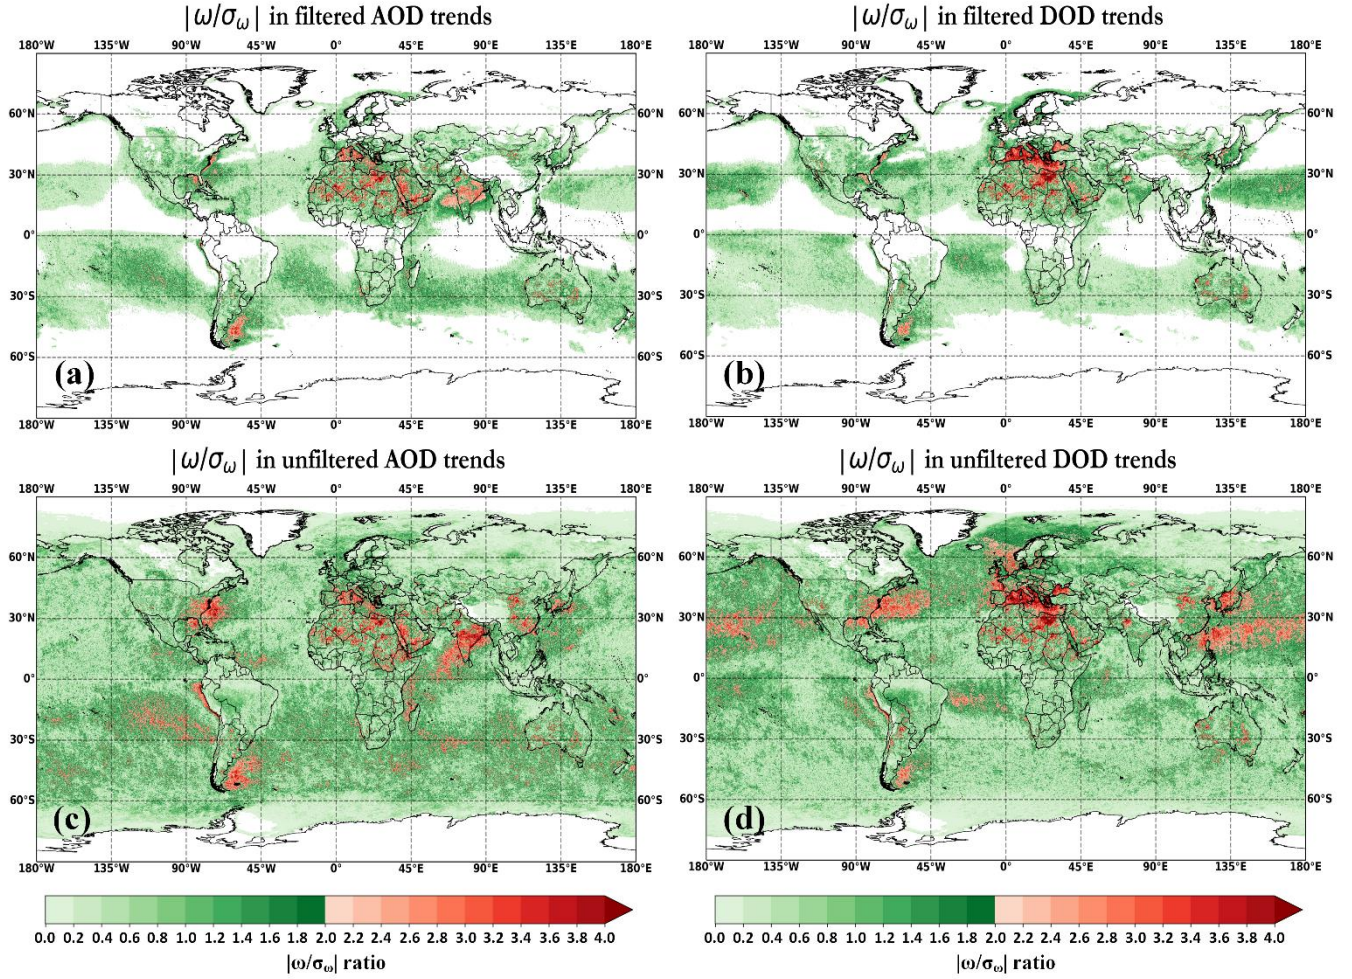

**Figure S6:** Global maps of  $|\omega/\sigma_\omega|$  ratio, at  $0.1^\circ \times 0.1^\circ$  spatial resolution, using Eq. (3) for AOD (a and c) and DOD (b and d). Upper panel (a, b) shows the filtered trends  $|\omega/\sigma_\omega|$  ratio (based on Fig. 2c, d trends) while the bottom panel (c, d) indicates the unfiltered trends  $|\omega/\sigma_\omega|$  ratio (based on Fig. 5a, b trends).



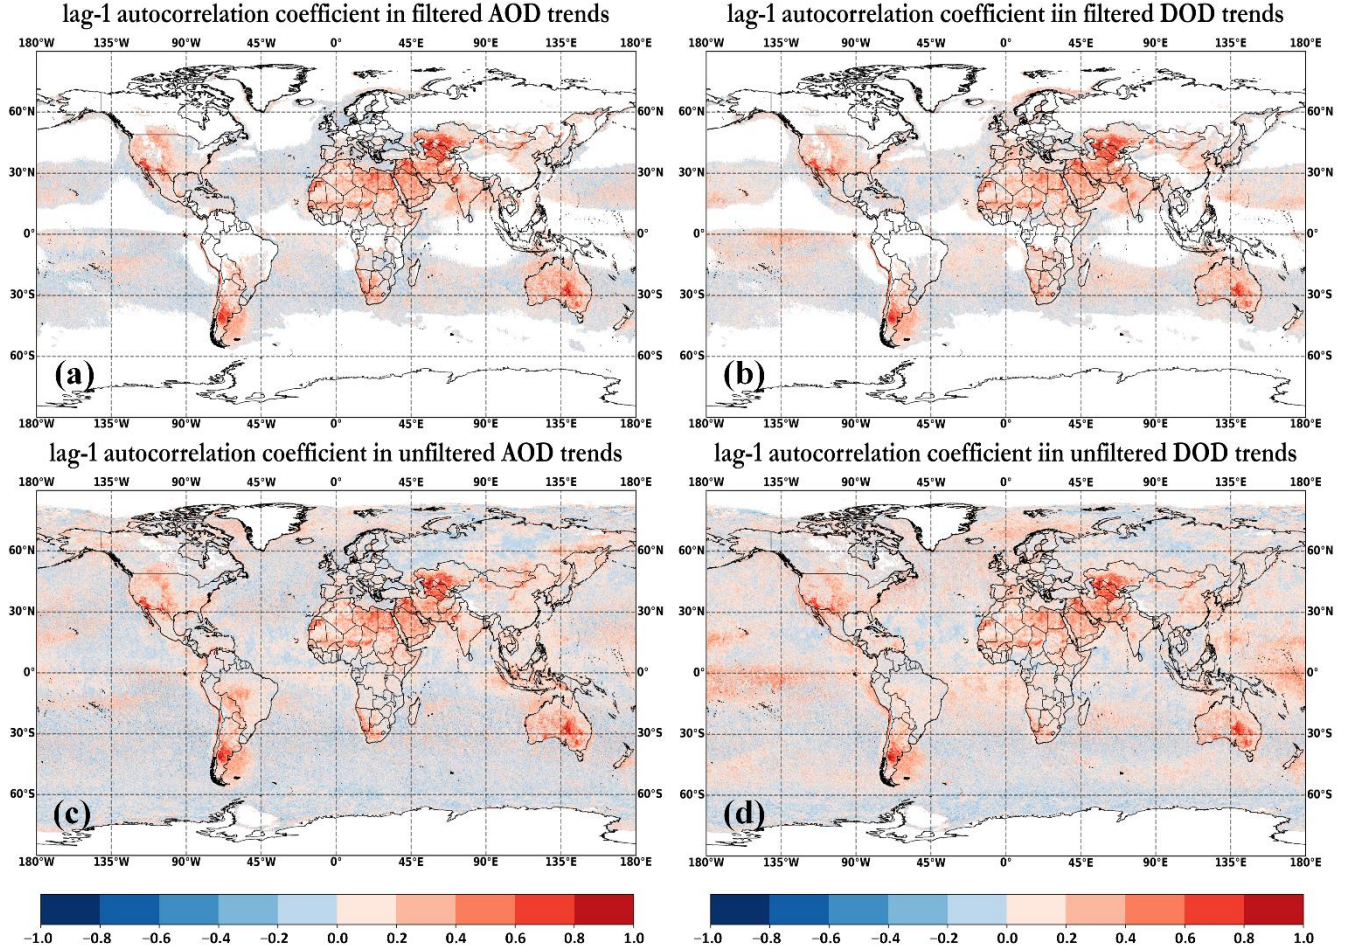

**Figure S7: Global maps of lag-1 autocorrelation coefficient, at  $0.1^\circ \times 0.1^\circ$  spatial resolution, using Eq. (3) for AOD (a and c) and DOD (b and d). Upper panel (a, b) shows the filtered trends of lag-1 autocorrelation coefficient (based on Fig. 2c, d trends) while the bottom panel (c, d) indicates the unfiltered trends of lag-1 autocorrelation coefficient (based on Fig. 5a, b trends).**



### Differences in data availability between unfiltered and filtered trend analysis

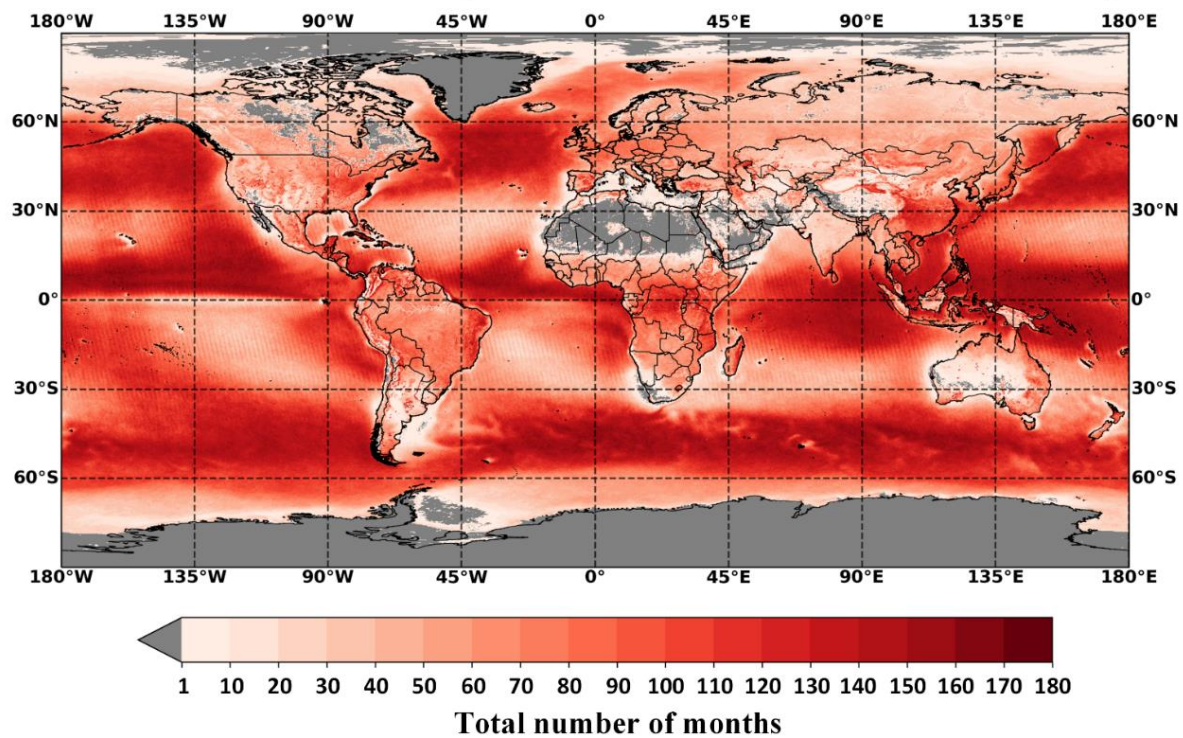

Figure S8: Differences in total number of months between the unfiltered (Fig. 5) and filtered (Fig. 2) trend analysis.

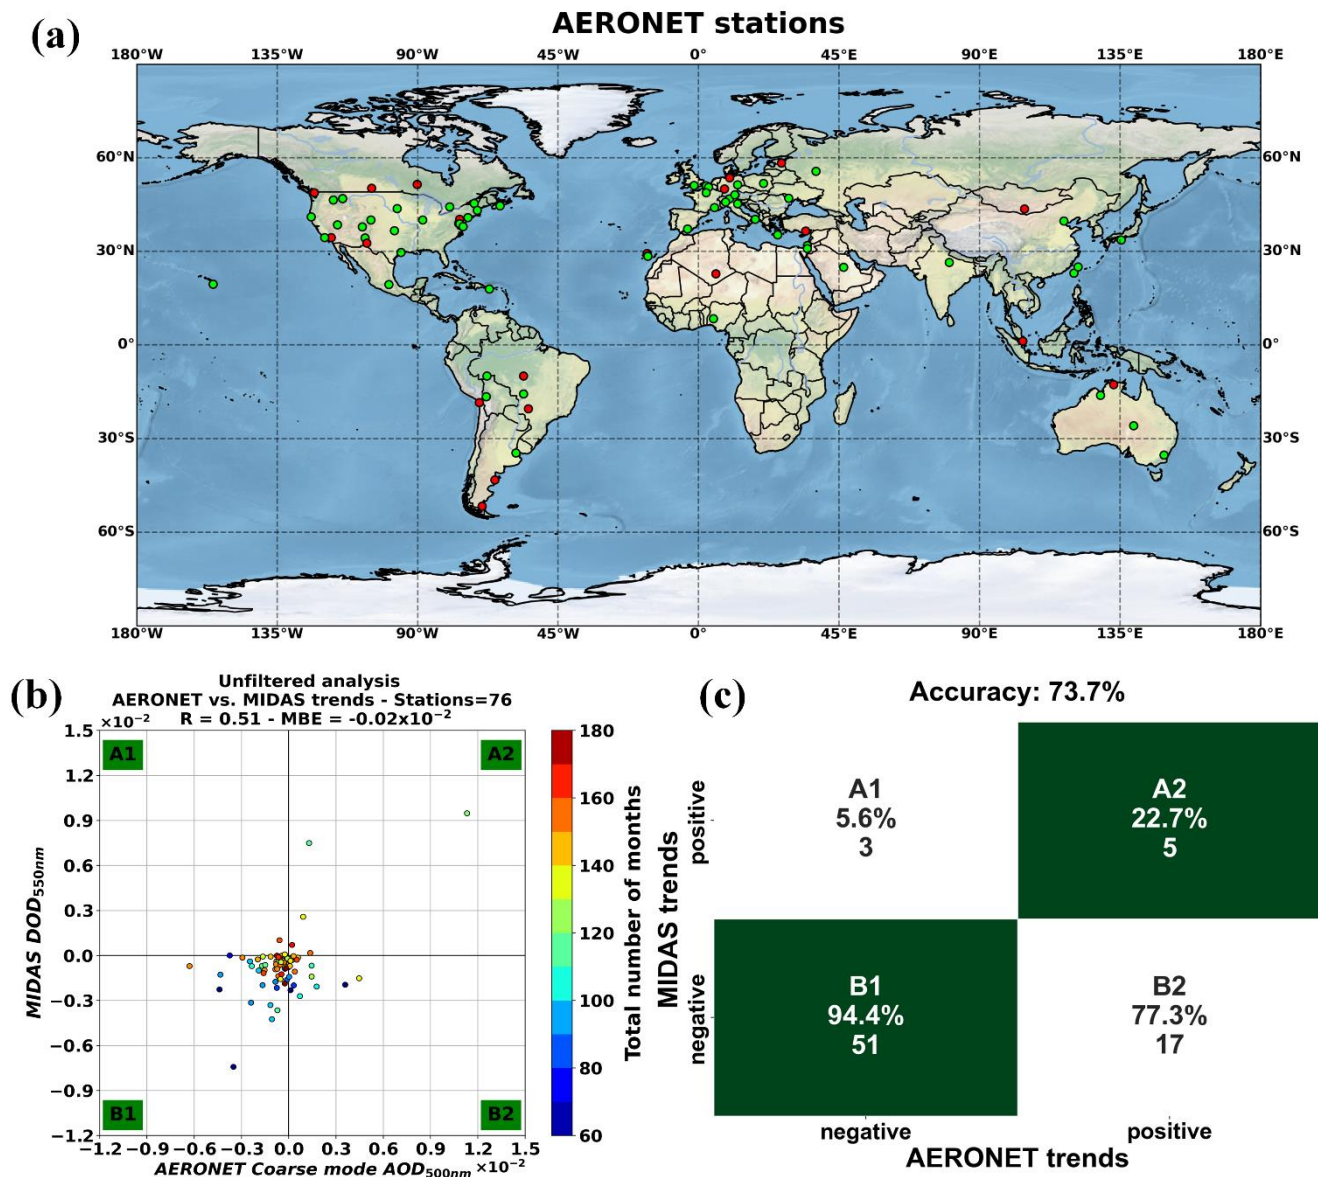

Figure S9: Same as Fig. 4 for unfiltered trend analysis.

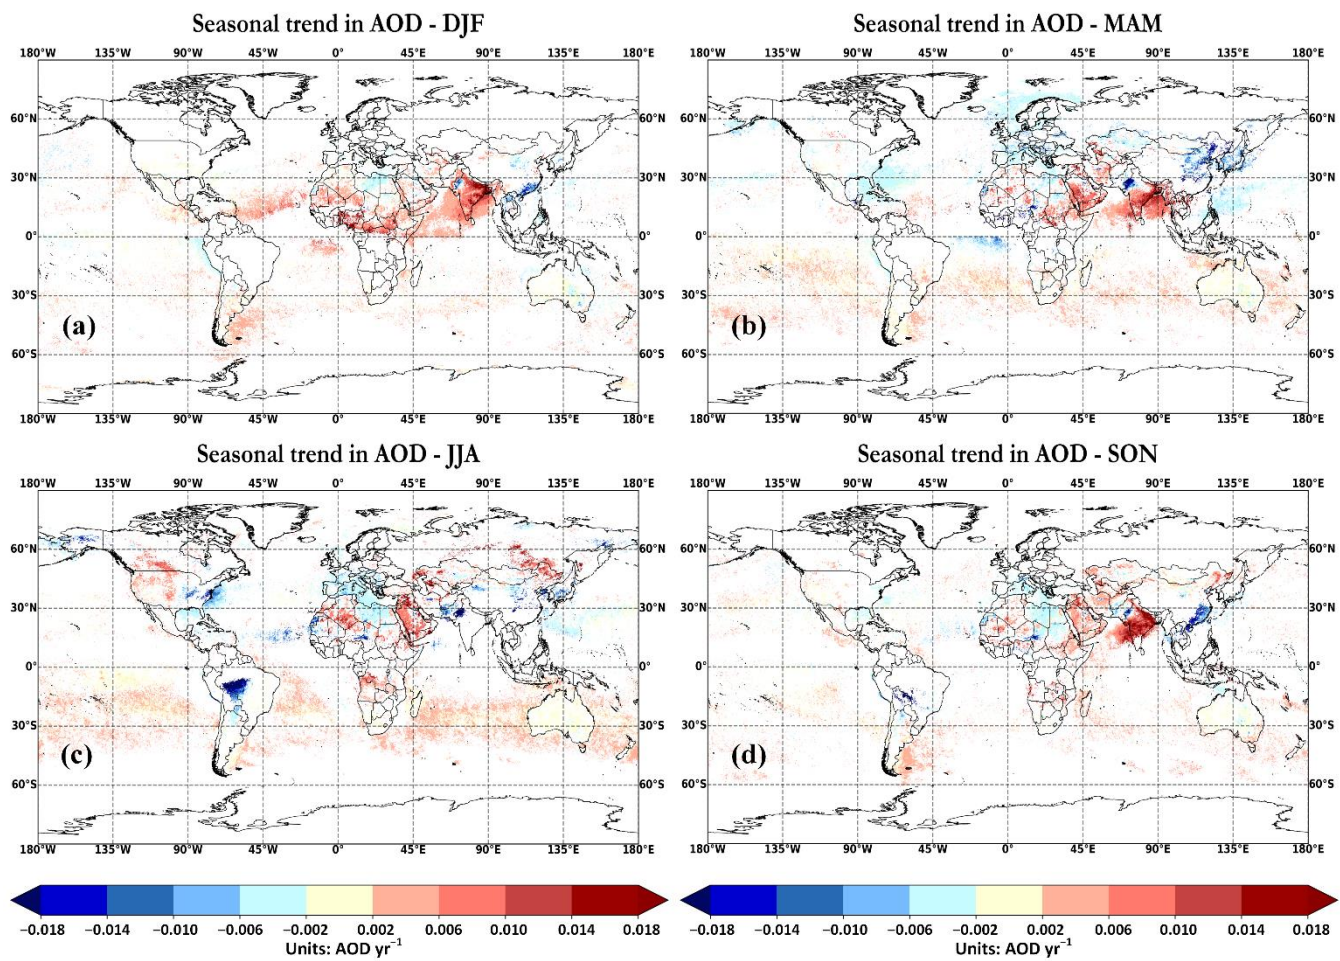

Figure S10: Same as Fig. 6 for AOD.



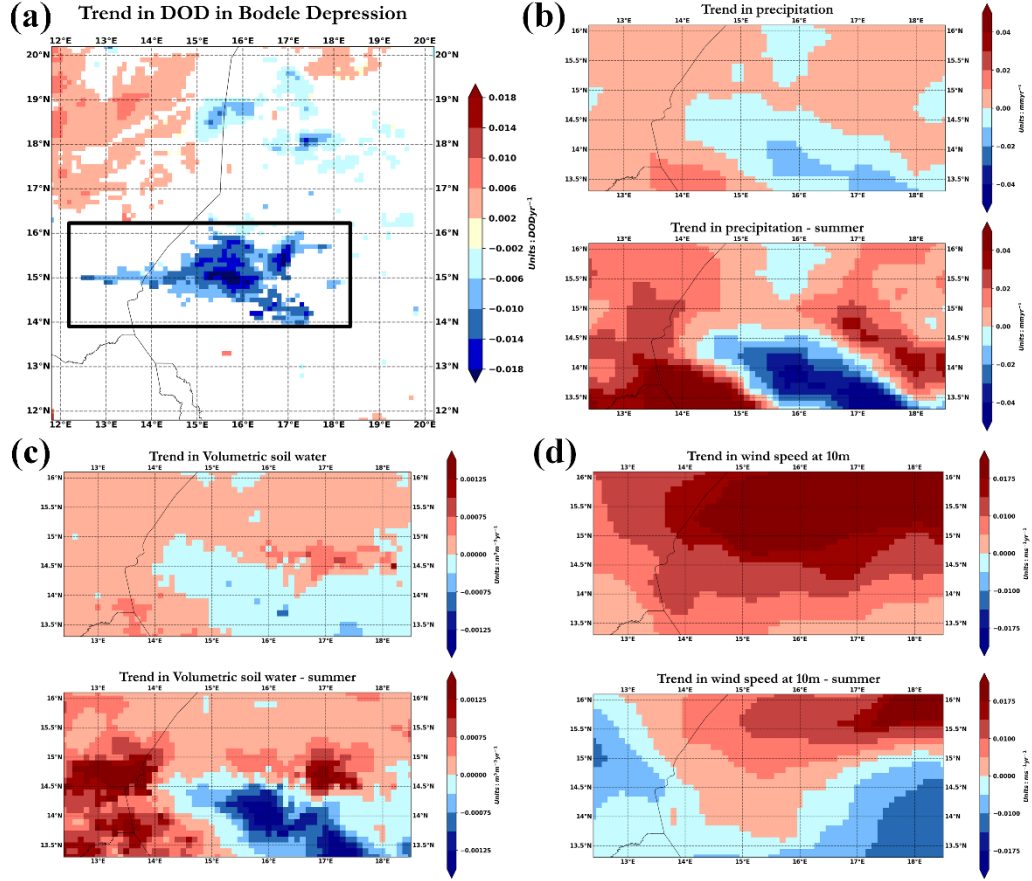

**Figure S11: Geographical distribution of long-term (a) DOD trends, and long-term along with summertime trends of (b) total precipitation, (c) volumetric soil water and (d) wind speed at 10m across Bodélé Depression. All the applied parameters are retrieved from ERA5 reanalysis dataset (<https://www.ecmwf.int/en/forecasts/datasets/reanalysis-datasets/era5>).**

Table S1: Regional trends between MIDAS DOD and AERONET coarse mode AOD. N refers to total number of MIDAS-AERONET months where the trends are calculated. The star symbols corresponds to statistically significant regions under the 95% (\*) and 90% (\*\*) confidence level. Additional information about AERONET stations can be retrieved by <https://aeronet.gsfc.nasa.gov/>. Green and red color refers to the stations with the similar and different trends sign, respectively.

| trends $\times 10^{-2} \text{ yr}^{-1}$ |          |          |     |           |                     |           |          |     |           |
|-----------------------------------------|----------|----------|-----|-----------|---------------------|-----------|----------|-----|-----------|
| Station                                 | AERONET  | MIDAS    | N   | Period    | Station             | AERONET   | MIDAS    | N   | Period    |
| Arica                                   | 0.019    | -0.014   | 83  | 2003–2017 | MD_Science_Center   | 0.0937    | -0.2469* | 83  | 2004–2017 |
| Birdsville                              | -0.011   | -0.108   | 106 | 2005–2017 | Moldova             | -0.0280   | -0.0896  | 106 | 2003–2017 |
| BONDVILLE                               | -0.121   | -0.054   | 61  | 2003–2017 | Nes_Ziona           | 0.0052    | -0.0823  | 61  | 2003–2017 |
| BSRN_BAO_Boulder                        | -0.095** | -0.053   | 95  | 2003–2016 | Railroad_Valley     | -0.0272   | -0.1243* | 95  | 2003–2017 |
| Canberra                                | -0.083*  | -0.002   | 111 | 2003–2017 | Rimrock             | -0.0555   | -0.1276* | 111 | 2003–2017 |
| Carpentras                              | -0.037   | -0.182*  | 107 | 2004–2017 | Santa_Cruz_Tenerife | 0.1418    | 0.0350   | 107 | 2003–2015 |
| CART_SITE                               | 0.009    | -0.026   | 134 | 2003–2017 | SEDE_BOKER          | -0.0377   | -0.1920  | 134 | 2003–2017 |
| CEILAP-BA                               | 0.081    | 0.200*   | 74  | 2003–2017 | SERC                | -0.2279*  | -0.1983* | 74  | 2003–2017 |
| CUIABA-MIRANDA                          | -0.224   | -0.048   | 71  | 2003–2017 | Sevilleta           | -0.0819*  | -0.0176* | 71  | 2005–2017 |
| Dalanzadgad                             | 0.093    | 0.022    | 90  | 2003–2017 | Shirahama           | -0.2022   | -0.1248  | 90  | 2003–2017 |
| FORTH_CRETE                             | -0.021   | -0.184   | 94  | 2003–2017 | Sioux_Falls         | -0.0938   | -0.1799* | 94  | 2003–2017 |
| Granada                                 | -0.080   | -0.447** | 70  | 2005–2017 | Solar_Village       | 1.2559**  | 1.0739   | 70  | 2003–2017 |
| GSFC                                    | -0.028   | -0.150*  | 109 | 2003–2017 | TABLE_MOUNTAIN_CA   | -0.0238   | -0.0681  | 109 | 2003–2017 |
| IMS-METU-ERDEMLI                        | -0.064   | -0.191** | 115 | 2004–2017 | Tamanrasset_INM     | 0.6188**  | 0.4369   | 115 | 2004–2017 |
| Ispira                                  | -0.133   | -0.152*  | 92  | 2003–2017 | Trelew              | 0.0640    | 0.0001   | 92  | 2003–2013 |
| Izana                                   | -0.059   | 0.0006   | 71  | 2004–2017 | Trinidad_Head       | -0.3544** | -0.1194* | 71  | 2006–2017 |
| Jabiru                                  | -0.097   | 0.012    | 73  | 2003–2017 | UCSB                | -0.0203   | -0.1900* | 73  | 2006–2017 |
| Kanpur                                  | -0.268   | -0.292   | 122 | 2003–2017 | Venise              | -0.0203   | -0.1100* | 122 | 2005–2017 |
| La_Parguera                             | 0.1514   | 0.3521** | 70  | 2004–2017 | White_Sands_HELSTF  | -0.0368   | 0.0171   | 70  | 2005–2017 |
| Lake_Argyle                             | -0.0779  | 0.0078   | 113 | 2003–2017 | XiangHe             | -0.2788*  | -0.1844  | 113 | 2003–2017 |
| Lecce_University                        | -0.0233  | -0.0195  | 105 | 2003–2017 |                     |           |          |     |           |
